1 **CryoEM PSII structure reveals adaptation mechanisms to environmental stress in *Chlorella***

2 ***ohadii***

3

4 Maria Fadeeva\*, Daniel Klaiman\*, Ido Caspy, and Nathan Nelson\*\*

5

6 Department of Biochemistry and Molecular Biology, The George S. Wise Faculty of Life Sciences,

7 Tel Aviv University, 69978 Tel Aviv, Israel

8

9 \*Equally contributed

10 \*\* To whom correspondence should be addressed:

11 [nelson@tauex.tau.ac.il](mailto:nelson@tauex.tau.ac.il)

12

## 13 **Summary**

14 Performing photosynthesis in the desert is a challenging task since it requires a fast adaptation to  
15 extreme illumination and temperature changes. To understand adaptive mechanisms, we purified  
16 Photosystem II (PSII) from *Chlorella ohadii*, a green alga from the desert soil surface, and  
17 identified structural elements that might enable the photosystem functioning under harsh  
18 conditions. The 2.72 Å cryogenic electron-microscopy (cryoEM) structure of PSII exhibited 64  
19 subunits, encompassing 386 chlorophylls, 86 carotenoids, four plastoquinones, and several  
20 structural lipids. At the luminal side of PSII, the oxygen evolving complex was protected by a  
21 unique subunit arrangement - PsbO (OEE1), PsbP (OEE2), CP47, and PsbU (plant OEE3  
22 homolog). PsbU interacted with PsbO, CP43, and PsbP, thus stabilising the oxygen evolving shield.  
23 Substantial changes were observed on the stromal electron acceptor side - PsbY was identified as  
24 a transmembrane helix situated alongside PsbF and PsbE enclosing cytochrome b559, supported  
25 by the adjacent C-terminal helix of Psb10. These four transmembrane helices bundled jointly,  
26 shielding cytochrome b559 from the solvent. The bulk of Psb10 formed a cap protecting the  
27 quinone site and probably contributed to the PSII stacking. So far, the *C. ohadii* PSII structure is  
28 the most complete description of the complex, suggesting numerous future experiments. A  
29 protective mechanism that prevented Q<sub>B</sub> from rendering itself fully reduced is proposed.

## 30 **Main**

31 Oxygenic photosynthesis of cyanobacteria, various algae, and land plants converts light energy  
32 from the sun into a biologically useful chemical energy concomitant, with the evolution of  
33 molecular oxygen<sup>1,2</sup>. The light reactions of photosynthesis depend on the functions of photosystem  
34 II (PSII), cytochrome b6f, and photosystem I (PSI). Driven by photon energy, these membrane-  
35 embedded machineries carry out a linear electron transfer from water to NADP<sup>+</sup>, and eventually,  
36 reduce CO<sub>2</sub> to form organic material<sup>3</sup>. PSI exhibits a different structural organisation among the  
37 photosynthetic organisms, while PSII organises itself mainly into a dimer, regardless of the species

38 of the organism. However, PSII interacts with a variety of light-harvesting proteins, to form  
39 supercomplexes of different sizes and shapes<sup>4</sup>. In *Chlamydomonas reinhardtii*, the various  
40 supercomplexes include C2S2 and C2S2M2L2 (C indicates the PSII core, while S, M, and L  
41 indicate strongly, moderately, and loosely associated LHCII, respectively). Among these,  
42 C2S2M2L2 is the largest known PSII–LHCII supercomplex in green algae or plants<sup>4,5</sup>. So far,  
43 none of the published structures of PSII contains all the expected subunits of the complex.  
44 Performing photosynthesis under extreme high light (HL) intensities is a challenge for the  
45 photosynthetic organisms, as well as for the artificial systems that rely on natural photosystems.  
46 As such, specialised photoautotrophs have devised mechanisms to dissipate the excess excitation  
47 energy, and reduce the potential photodamage that intense illumination causes to PSII, and also to  
48 the less sensitive Photosystem I (PSI)<sup>6,7</sup>. The green alga *Chlorella ohadii*, which was isolated from  
49 a desert biological soil crust, copes with these harsh conditions, including extremely high daytime  
50 illumination (~2000  $\mu\text{E}$ )<sup>8</sup>. Unlike other photosynthetic organisms, *C. ohadii* does not undergo  
51 photodamage, even when exposed to light intensities that are 3 to 4-fold higher than that which is  
52 required to saturate the CO<sub>2</sub> fixation<sup>9</sup>. It has been proposed that under high illumination, *C. ohadii*  
53 activates several protection mechanisms, including a massive cyclic electron transport within PSII  
54 that can be as high as 90% of the electrons from water splitting<sup>10,11</sup>. These adaptive capabilities  
55 should be reflected in structural alterations in the PSII complex. We isolated a highly active PSII  
56 supercomplex from *C. ohadii* and determined its high-resolution structure (Fig. 1, Fig. S1 and 2)  
57 using cryoEM (Methods). Overall, the structure resembled that of the C2S2M2L(N)2-type PSII-  
58 LHCII supercomplex from *C. reinhardtii* (PDBID 6KAD and 6KAF)<sup>4,12</sup>. Our new structure  
59 contains three additional subunits in each PSII monomer, denoted as PsbP, Psb10, and PsbY (Fig.  
60 1 and 2), which might serve as pillars for the stability of the *C. ohadii* complex (PDBID 8BD3).  
61 Moreover, subunits that are critical for the stability and the oxygen evolution of PSII are better  
62 resolved, exhibiting critical interaction sites with other subunits of the complex. The cryoEM

63 structure of PSII at 2.72 Å unveiled 64 subunits containing 386 chlorophylls, 86 carotenoids, four  
64 plastoquinones, and several conserved structural lipids.

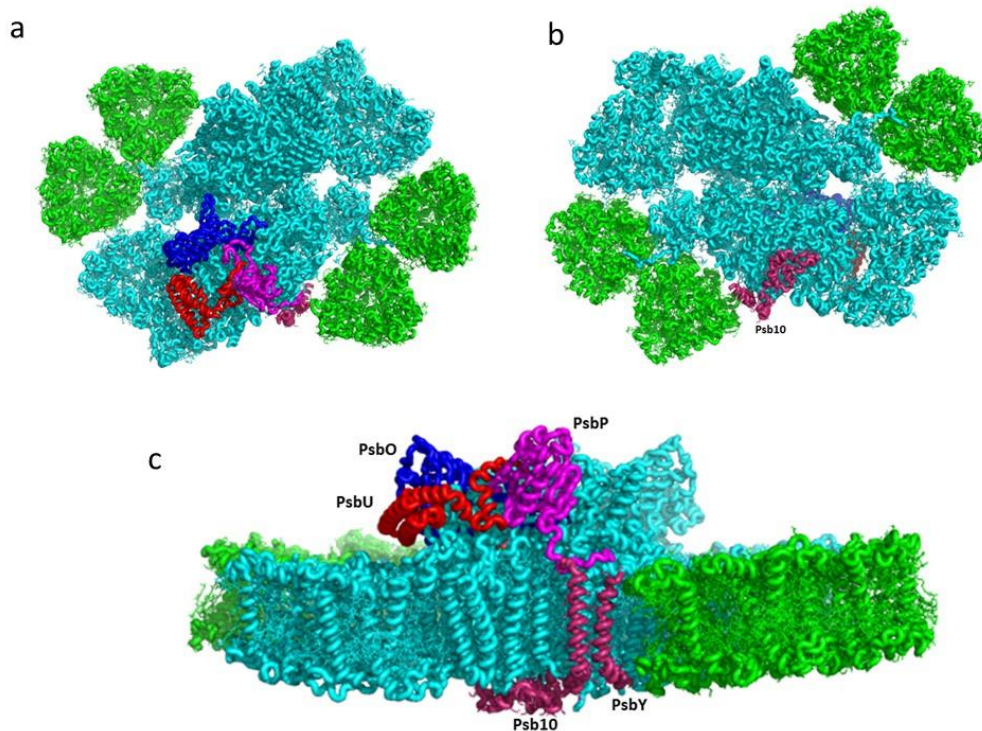

65  
66 **Figure 1: CryoEM structure of the *C. ohadii* PSII complex:**  
67 **a)** Top view of the supercomplex from the stromal side. The novel or rare subunits are coloured  
68 (PsbP-magenta, PsbO-blue, PsbU-red, and Psb10 and PsbY are in purple. **b)** Luminal view of  
69 the supercomplex. **c)** Side view along the membrane plane.  
70

71 PSII reaction centre is engulfed by shielding subunits, both from the luminal and stromal side (Fig.  
72 2 and 3). The function of these extrinsic luminal subunits of PSII is still under strong debate<sup>13-15</sup>.  
73 In higher plants, they have been proposed to operate primarily during the biogenesis of the  
74 complex<sup>14</sup>. The main conclusion from the numerous reported experiments is that these domains  
75 are essential for the stability of the PSII supercomplex. The structure of the luminal extrinsic  
76 subunits and their interactions have been elucidated (Fig. 3). It is well documented that Oxygen  
77 Enhancer Element 1 PsbO (OEE1) intactness is critical for the stability and the activity of PSII. A  
78 single amino acid substitution (P104H) in *C. reinhardtii* has rendered PSII temperature sensitive  
79 and caused the disappearance of the entire complex at the nonpermissive temperature of 37°C<sup>16</sup>.

80 The tertiary structure of *C. ohadii* PsbO is quite conserved, albeit sharing just 75% identity with  
81 the sequence of the *C. reinhardtii* protein. *C. ohadii* PsbO is secured by strong interactions with  
82 CP47 via a stabilising loop that was not resolved in the *C. reinhardtii* structure, together with  
83 subunit PsbP, that is not present in the latter structures (PDBID 6KAD and 6KAF)<sup>4,12</sup>.

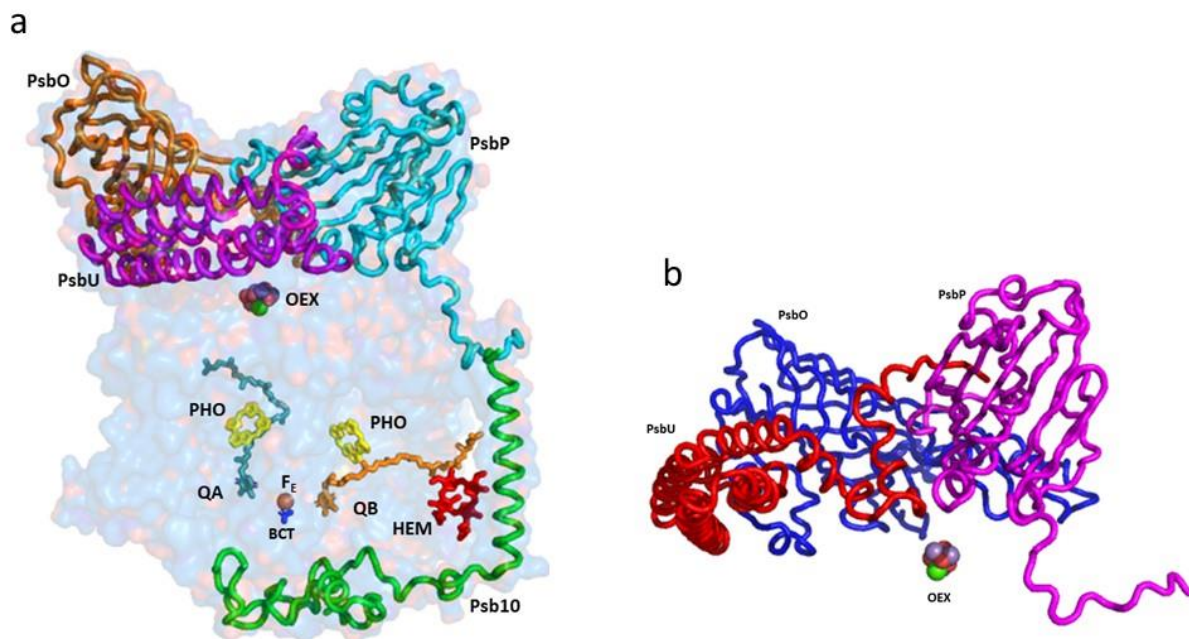

84

85 **Figure 2: Side view of the subunits that are shielding the reaction centre:**

86 **a)** The indicated subunits and the prosthetic groups are shown on the background of a surface  
87 model, with 80% transparency of the PsbA, PsbB, PsbC, PsbD, PsbP, PsbO, PsbU, and Psb10  
88 subunits. **b)** The structure of the luminal extrinsic subunits and their interactions with each  
89 other: A ribbon presentation of the three main subunits protecting the oxygen evolving complex  
90 (OEX). The extensive interactions among OEE1 (PsbO), OEE2 (PsbP), and OEE3 (PsbU) are  
91 shown.

92

93 PsbP is an Oxygen Enhancer Element 2 (OEE2) that was pronouncedly present in our structure  
94 (Fig. 1 and 2). PsbP deletion in *C. reinhardtii* resulted in the loss of oxygen evolution activity but  
95 was only marginally affected the assembly of the other PSII subunits<sup>17</sup>. Regardless of its  
96 expression in the various organisms, PsbP was missing in several of the PSII preparations. In *C.*  
97 *reinhardtii*, PSII was identified in the cryoEM structure of the C2S2-type PSII-LHCII  
98 supercomplex from (PDB 6KAC)<sup>4</sup>, however, it was not present in the structure of the larger PSII



99 form (PDB 6KAD)<sup>12</sup>. The *C. ohadii* PsbP counterpart was only 69% identical to its *C. reinhardtii*  
100 homologue. Yet, despite the differences in the amino acid sequences, the structure of the  
101 corresponding subunits was relatively similar. Thus, the interaction between the specific amino  
102 acids was probably responsible for the stability that *C. ohadii* OEE2 conferred. One example is a  
103 R368F substitution 16 Å away of the oxygen evolving complex (OEC). A nearby substitution of  
104 K371G might also contribute to the stability of this important site. The tight binding of PsbP might  
105 contribute to the overall stability of the large luminal structure that protects OEC.

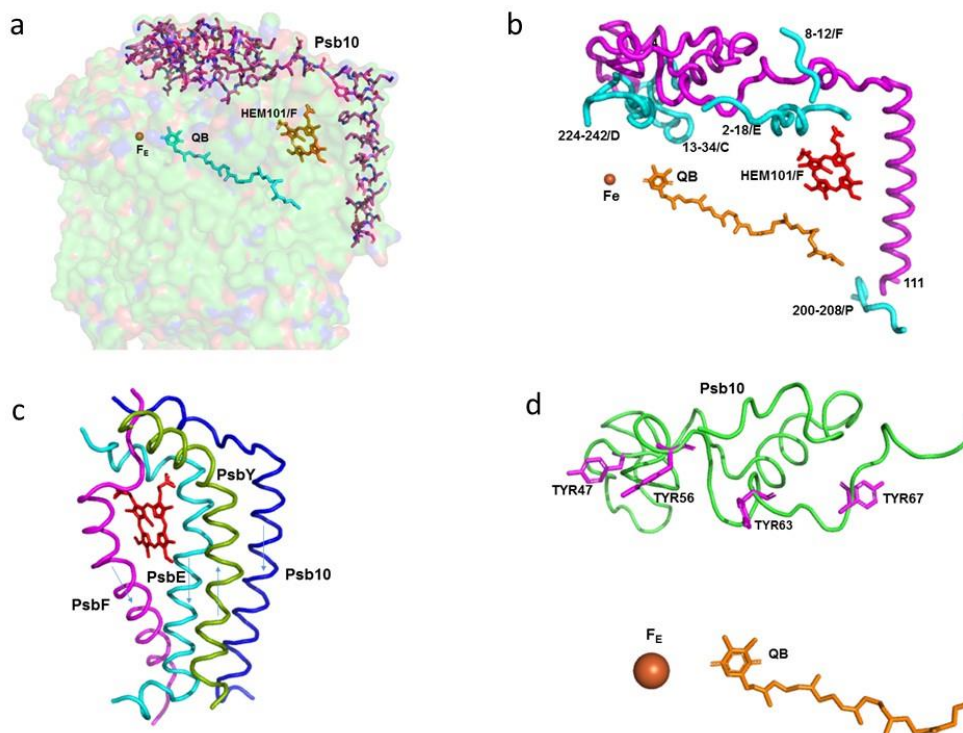

106

107 **Figure 3: The structure and interaction of the subunits involved in the protection of the**  
108 **acceptor site of PSII, including Fe, Q<sub>B</sub>, and cytochrome b559:**

109 **a)** Stick presentation of Psb10 shown on the background of a surface model, with 80%  
110 transparency of the subunits PsbA, PsbC, PsbD, PsbE, PsbF, PsbY, and Psb10. **b)** Interaction  
111 of Psb10 with the various PSII subunits: A ribbon presentation of the Psb10 interaction with  
112 the indicated subunits. **c)** Transmembrane helices shielding the heme of cytochrome b559. The  
113 transmembrane helices of Psb10, PsbE, and PsbF are going from the stroma to the lumen. The  
114 helix of PsbY is going in the opposite direction. **d)** Four tyrosine residues of Psb10 pointing to  
115 the Fe-Q<sub>B</sub> location.

116

117 The sequence of the nuclear gene of the 16 kDa Oxygen Enhancer Element 3 (OEE3) polypeptides  
118 present in the oxygen evolving complex of *C. reinhardtii* have been established<sup>18,19</sup>. The  
119 comparison between the OEE3 protein sequences of *C. reinhardtii* and the higher plants has  
120 revealed a mere 28% overall homology, mostly limited to the central portion of the protein. We  
121 identified OEE3 in the *C. ohadii* PSII structure (PsbU) as four bundled helices laying atop CP43,  
122 contacting PsbO (Fig. 2). PsbU extended N-terminus contacted with PsbP, supported by a  
123 subsequent helix-helix interaction with CP43 (Fig. 2). This arrangement has suggested a major  
124 function in stabilising the entire large complex, isolating the OEC from the luminal medium. The  
125 PsbU subunit, like PsbP, was absent in the large PSII complex from *C. reinhardtii* (PDBID 6KAD).  
126 Due to the formation of stacked PSII in the grana, there was no place for large protrusions at the  
127 stromal side of the complex. So far, no specific amino acid sequences were shown to be directly  
128 involved in the PSII dependent grana formation<sup>20</sup>. The structure of *C. ohadii* PSII presented a  
129 slight deviation of this rule by the presence of the “PSII 10 kDa polypeptide”. This subunit has  
130 been denoted as Psb10 and was evident in our structure (Fig. 2-3). An unidentified stromal protein  
131 (USP) that was present in the C2S2 supercomplex but was not observed in the C2S2M2L2  
132 supercomplex of *C. reinhardtii* might be its homologue<sup>4</sup>. Subunit Psb10 was located at the  
133 interface between two adjacent C2S2 supercomplexes that are stacked with each other along their  
134 stromal surface and might represent the partial Psb10 subunit that is entirely present in the *C.*  
135 *ohadii* structure (Fig. 3). According to the published sequences, Psb10 was not present only in  
136 algae but also in moss and higher plants - but not in cyanobacteria. This suggests that Psb10 might  
137 have emerged alongside the PSII mediated grana staking. The Psb10 polypeptide N-terminus  
138 was located at the stroma, forming a cap over the interface between CP43 and D2, subsequently,  
139 establishing an interface with PsbE and PsaF N-termini. Finally, it formed a transmembrane helix  
140 parallel to and in a strong contact with PsbE transmembrane helix (Fig. 3). The position of this  
141 helix was similar to that of the alpha helix that was identified in PDB 6KAC and built as a

142 polyalanine chain<sup>4</sup>. The Psb10 C-terminus interacted with PsbP on the luminal side of the  
 143 membrane (Fig. 2 and 3). This arrangement leaves little doubt regarding the important function of  
 144 Psb10 in stabilising the *C. ohadii* PSII supercomplex. Finally, Psb10 might support the interaction  
 145 between the two PSII complexes that form the stacked PSII (Fig. S3). The function of Psb10 is  
 146 unknown but its four tyrosine residues facing the Q<sub>A</sub>-Fe-Q<sub>B</sub> cluster suggest an involvement in  
 147 protection against radicals (Fig. 2-4).

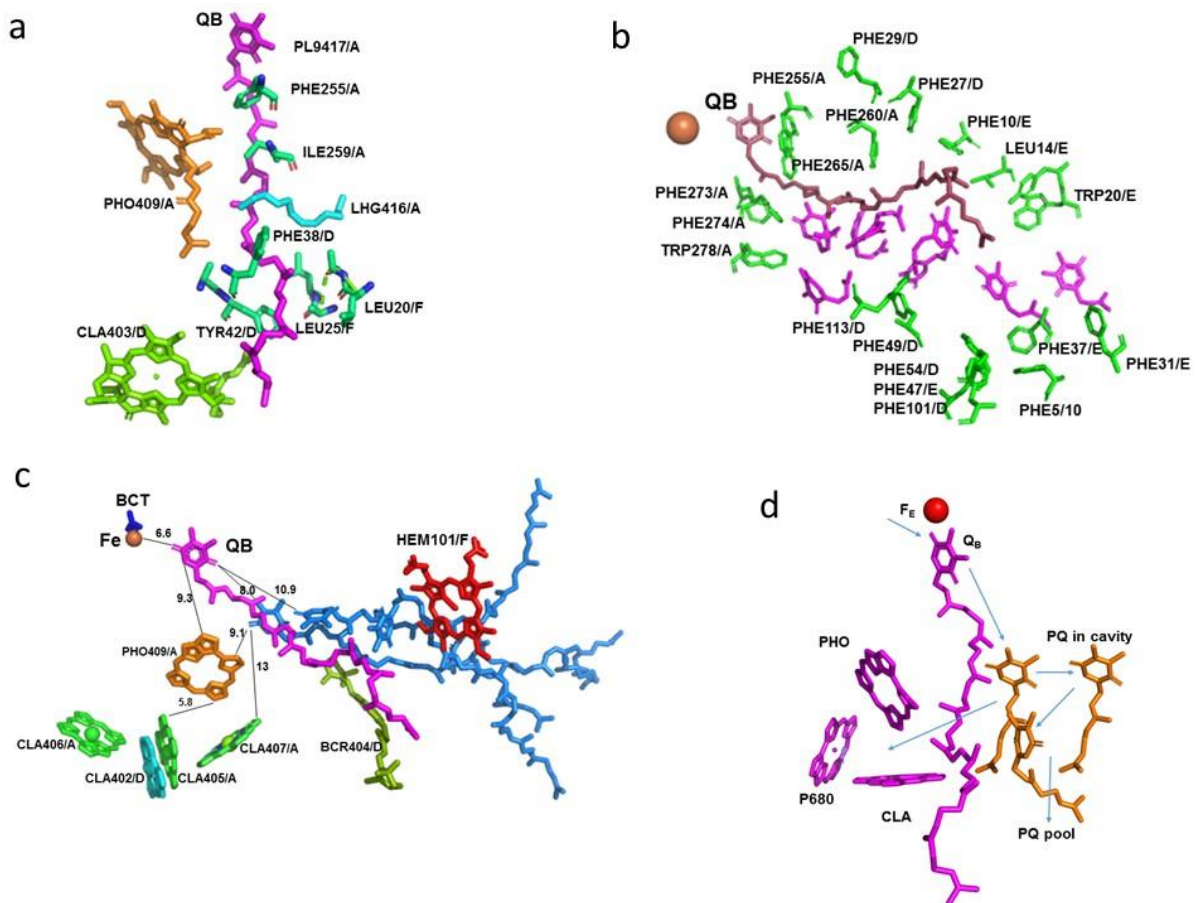

148

149 **Figure 4: Structure of Q<sub>B</sub> and its vicinity in relation to the factors involved in the electron**  
 150 **transport and quenching:**

151 **a)** Interactions of Q<sub>B</sub> with the surrounding amino acids and prosthetic groups. The amino acids  
 152 and the prosthetic groups that are in contact with Q<sub>B</sub> are specified. **b)** Hydrophobic cavity  
 153 proceeding from Q<sub>B</sub> to the exterior of the complex. The amino acids surrounding the cavity are  
 154 specified and coloured green. Space filling of seven Q1 molecules (magenta) modelled into the  
 155 cavity with no structural clashes. **c)** Position and distances of the prosthetic groups pertinent for  
 156 the function of PSII. Three plastoquinone molecules (light blue) modelled into the cavity with  
 157 no structural clashes. The indicated distances are in Å. **d)** Potential electron transfer pathways



158 that might involve in the electron transfer from  $Q_B$  to plastocyanin, quenching, and the cyclic  
159 electron transport.  
160

161 Another pillar connected to the subunits PsbE, PsbF, and Psb10 was the position of PsbY in the  
162 PSII complex. PsbY is a single transmembrane helix protein, yet it is encoded and translated as  
163 multiple copies in a single protein. In *C. ohadii*, PsbY appeared in four copies, but in some green  
164 algal species, such as *Micractinium conductrix*, *Volvox*, *Chlamydomonas*, and *Scenedesmus*, it  
165 manifested itself in 3-5 copies, while in the higher plants, only two copies were present in a single  
166 transcript. The copies within the transcript were identical, or highly homologous. Polyprotein  
167 transcripts are quite common in viruses<sup>21</sup>, and it would be of no surprise if PsbY is of viral origin.  
168 This notion was supported by the different copies present in the closely related organisms (Fig.  
169 S4).

170 PsbY joined a triplet of transmembrane helices that were formed by PsbE, PsbF, and Psb10, while  
171 running antiparallel to them (Fig. 3c). Together, they shield the heme group of cytochrome b559,  
172 which otherwise would be exposed to the membrane interior environment. This arrangement also  
173 stabilised the position of the prosthetic group that might be crucial for the protection of PSII from  
174 photodamage caused by excessive light intensities, when electron acceptors are lacking.

175 Following light absorption, charge separation converts excited  $P680^*$  to create the longer-lived  
176 state  $Yz^+ Q_A^-$ . The hole in  $Yz^+$  can be filled by an electron from the manganese oxygen evolving  
177 complex (OEC), or from the electron acceptor side, either directly, or via rapid equilibrium with  
178  $P680^+$ . Under ambient conditions,  $Q_A^-$  transfers its electron forward to  $Q_B$ , which is mediated by  
179 the non-heme iron site<sup>22</sup>. The reaction is relatively slow, and takes place in a sub millisecond time  
180 range<sup>23</sup>. If the oxidized quinones are absent, or present in limited availability, the electron may  
181 return via many possible routes to  $P680^+$  or OEC. None of these routes are visible under continuous  
182 light, or even via the S-state turnover measurements<sup>24-26</sup> and it was considered as radical protective

183 cyclic electron transport<sup>25-27</sup>. Cytochrome b559 was suggested to participate in this cyclic electron  
184 transport<sup>28</sup>. The presence of oxidized PQ in tiny amounts, which was maintained by the cycling  
185 electrons, might be sufficient to protect this photosynthetic organism from radical damage.

186 The efficient drainage of electrons/reductants from the reaction centres for metabolic or other uses  
187 could help protect the photosynthetic machinery from the damage that is caused by the excess  
188 illumination<sup>10</sup>.  $Q_A^{\bullet-}$ , the reduced semiquinone form of the nonexchangeable quinone, is often  
189 considered capable of a side reaction with  $O_2$ , forming superoxide and damaging radicals<sup>27,28</sup>.

190 Fantuzzi et al., (2022)<sup>29</sup>, using chlorophyll fluorescence in plant PSII membranes, showed that  $O_2$   
191 oxidizes  $Q_A^{\bullet-}$  at physiological  $O_2$  concentrations, with a  $t_{1/2}$  of 10 s.  $Q_A^{\bullet-}$  could only reduce  $O_2$   
192 when bicarbonate was absent from its binding site on the nonheme iron ( $Fe^{2+}$ ). It was concluded  
193 that the reduction of  $O_2$  was favourable when the oxygen binds directly to  $Fe^{2+}$ . This contrasts with  
194 a previously proposed mechanism involving direct oxidation of  $Q_A^{\bullet-}$  by  $O_2$ , which was expected  
195 to require close contact between the oxygen and the semiquinone<sup>29-32</sup>. Thus, *C. ohadii* PSII, which  
196 copes with extreme high daytime illumination of up to 2000  $\mu E$ , either contains an extremely tight  
197 bicarbonate binding site, or has an altered sequence of events that are linked to the reduction state  
198 of the quinone pool<sup>33</sup>. Our structure suggests a conserved bicarbonate binding site. However, in  
199 contrast to most preparations of PSII, where  $Q_B$  is missing, in *C. ohadii*  $Q_B$ , it was clearly identified  
200 at its binding site. This structure revealed strong interactions with the surrounding amino acids and  
201 prosthetic groups (Fig. 4a). It is worth noting that the terminal end of its isoprenoid chain was  
202 tightly held by the surrounding hydrophobic amino acids. We propose that the tight binding of  $Q_B$   
203 and the plastoquinones in the hydrophobic pocket are responsible for the PSII resistance to the  
204 high light intensities. Accordingly, the direct electron transfer from  $Q_A^{\bullet-}$  to  $Q_B$  and the fast transfer  
205 of the electron from  $Q_B^{\bullet-}$  to the quinone pool protects *C. ohadii* PSII from photodamage. The  
206 observation that the plastoquinone pool of *Nannochloropsis oceanica* was not completely reduced  
207 during the bright light pulses<sup>34</sup>, as well as in the plants<sup>35</sup>, is in line with this study's proposal for

208 the mechanism of photoprotection in *C. ohadii*. A wide hydrophobic cavity was observed, starting  
209 at  $Q_B$  and going out of PSII to the middle of the membrane, and might contain several quinones  
210 (Fig. 5). A similar cavity was detected in the crystal structure of *T. elongatus*, and it was proposed  
211 to harbour a specialised quinone  $Q_C$ <sup>35-38</sup>. The potential occupancy allowed the quinones to pack  
212 together, maintaining distances of less than 10 Å from each other (Fig. 4c). This distance allows  
213 electron transfer in about 1 ns, which is several orders of magnitude faster than 0.5 ms required  
214 for the electron transfer from  $Q_A$  to  $Q_B$ <sup>23,39</sup>. Three plastoquinone exchange pathways were  
215 previously identified by molecular dynamic simulations of PSII<sup>40</sup>. One of these ensued close to  
216 the heme of cytochrome b559, and might coincide with the hydrophobic cavity that is described  
217 in this work. This part of the PSII hydrophobic cavity was exposed to the membrane, providing an  
218 ideal binding site (if one even exists) to the cytochrome b6f complex. Our suggested mechanism  
219 does not require an instantaneous escape of reduced  $Q_B$ , and the exchange of the reduced and  
220 oxidised plastoquinones might take place at the edge of the hydrophobic cavity, or even outside in  
221 the mid-membrane medium (Fig. 5).

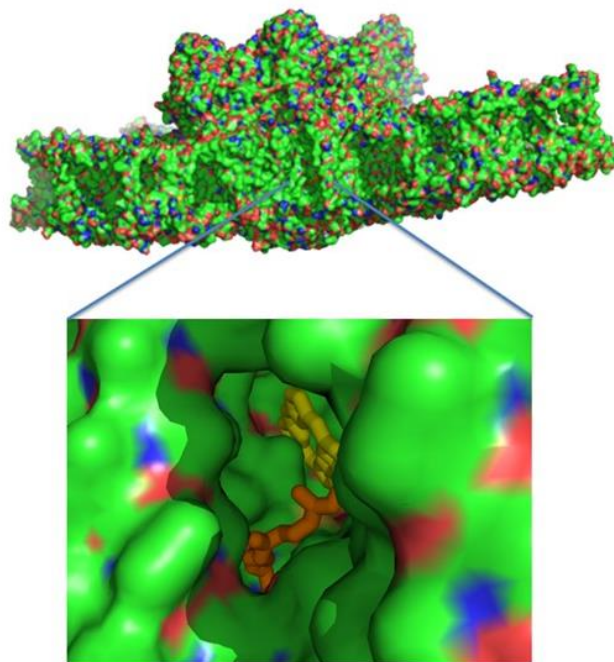

222

223 **Figure 5: A surface presentation of PSII viewed from the membrane interior.**

224 Zooming the middle reveals; a hydrophobic cavity, where pheophytin A and part of the Q<sub>B</sub>  
225 isoprenyl chain are apparent.  
226

227 *C. ohadii* was far less sensitive to Diuron (DCMU) than other green algae<sup>9</sup>. This effect can be  
228 explained by the tighter binding of Q<sub>B</sub> and reduced Diuron accessibility to its binding site. A recent  
229 study on the binding properties of the photosynthetic herbicides with the Q<sub>B</sub> site of the D1 protein  
230 in plants have demonstrated that the high affinity inhibitors, such as Diuron, have replaced Q<sub>B</sub> at  
231 its binding site<sup>38-42</sup>. A similar mode of interaction was established for Terbutryn binding in  
232 cyanobacterial PSII<sup>43</sup>. The less potent herbicides, such as Bentazon, bind away from this site in a  
233 manner that should prevent the secondary quinones from accessing the cavity, as proposed in this  
234 manuscript. Thus, a high metabolic rate, such as rapid lipid production, might serve as the best  
235 route to protect PSII from the damage that is caused by the intense illumination<sup>34,44</sup>. The  
236 accumulation of quinones in the vicinity of the reaction centre (CLA407/A), with Q<sub>B</sub> and the heme  
237 of PsbF, might also provide an ideal environment for cycling the excess electrons, or to quench  
238 the radicals when they occur (Fig. 4c). This is in line with the suggestion that PsbL prevents the  
239 reduction of PSII by the back electron flow from plastoquinol and protecting PSII from  
240 photoinactivation, whereas PsbJ regulates the forward electron flow from Q<sub>A</sub><sup>\*-</sup> to the  
241 plastoquinone pool<sup>2</sup>.

242 In conclusion, we reported the most complete description of a eukaryotic PSII cryoEM structure  
243 from the high-light resistant green algae *C. ohadii*, revealing a tight encapsulation and robust  
244 protection of the OEC, providing a structural basis for the algae's ability to resist photodamage,  
245 even at extreme illumination intensities. On the electron acceptor side, we identified a novel  
246 subunit Psb10 that together with PsbE, PsbF, and PsbY, shielded cytochrome b559 from its local  
247 environment. Finally, we detected the elusive Q<sub>B</sub> in our structure, probably due to the unique  
248 architecture of its hydrophobic binding pocket in *C. ohadii* PSII, that leaves ample room for

249 additional quinones to occupy, thus generating a protective mechanism that prevent over-reduction  
250 of Q<sub>B</sub> molecules.

## 251 **Materials and Methods**

### 252 **Purification of the PSII supercomplex from the *C. ohadii* cells**

253 The *C. ohadii* cells were cultured in 10 litres of TAP (Tris-Acetate-Phosphate) minimal medium  
254 under continuous white light (80  $\mu$ E) at 25°C for about 4 days, until they reached an absorbance  
255 of 0.75 OD at 730 nm. The culture was harvested by centrifugation at 3,500 g for 5 min and resus-  
256 pended in a medium containing 25 mM MES-KOH, pH=6.0, 200 mM sucrose, 10 mM NaCl, and  
257 5 mM MgCl<sub>2</sub>. The cells were washed once in the same buffer, spun down by centrifugation at  
258 5,000 g for 5 min, and then suspended in a homogenization buffer containing 30 mM MES-NaOH,  
259 pH=6.0, 300 mM sucrose, and 0.2 mM EDTA-Na. Protease-inhibitor cocktail was added to the  
260 final concentrations of 1mM PMSF, 1  $\mu$ M pepstatin, 60  $\mu$ M bestatin, and 1mM benzamidine. The  
261 cells were disrupted by an Avestin® EmulsiFlex-C3 at 2,000 psi (two cycles), and the resulting  
262 suspension was immediately diluted twice with a buffer containing 20 mM MES-NaOH, pH=6.0,  
263 and 300 mM sucrose, to decrease the EDTA concentration. The unbroken cells and starch granules  
264 were removed by centrifugation at 12,000 g for 5 min, and the membranes in the supernatant were  
265 precipitated by centrifugation in a Ti70 rotor at 148,200 g for 40 minutes. The pellet was suspended  
266 in the buffer that contained 20 mM MES-NaOH, pH=6.0, and 300 mM sucrose, giving a Chl con-  
267 centration of 2.0 mg/ml.

268 n-Decyl- $\alpha$ -D-Maltopyranoside ( $\alpha$ -DM) and n-octyl  $\beta$ -D-glucopyranoside were added dropwise to  
269 a final concentration of 2.0% and 0.75%, respectively. After stirring at 4°C for 25 min, the  
270 insoluble material was removed by centrifugation at 20,800 g for 15 min. The supernatant was  
271 loaded on the sucrose gradients in an SW-60 rotor ( $\approx$ 640  $\mu$ g of chlorophyll per tube). The gradient  
272 composition was 20-50% sucrose, 20 mM Mes-NaOH, pH 6.0, and 0.2%  $\alpha$ DM, and this was  
273 centrifuged at 310,000 g for 14-16 h. The Extended Data Fig X (below) shows the distribution of



274 the green bands in the tubes and SDS-PAGE of the main bands. The band containing PSII was  
275 diluted 10-fold to reduce the sucrose, using 20 mM MES-NaOH, 6.0, and 0.1%  $\alpha$ -DM to remove  
276 the sucrose, and concentrated using the centrifugal concentrator Vivaspin®6 (MWCO 100,000  
277 PES membrane), to a final chlorophyll concentration of 2.9 mg/ml, with an oxygen evolution  
278 activity of 336  $\mu$ mole O<sub>2</sub>/mg chl/h.

### 279 **CryoEM and the image processing.**

280 Three  $\mu$ l of purified PSI at a concentration of 3 mg/ml was applied to the glow-discharged holey  
281 carbon grids (Cu QUANTIFOIL® R1.2/1.3), then vitrified using a Leica GP2 plunge freezer  
282 (2.5 s blot, 4°C, 100% humidity). The images were collected on a 300 kV FEI Titan Krios2 electron  
283 microscope (EMBL, Heidelberg, Germany). A Gatan K3 Summit detector was used in a counting  
284 mode at a magnification of 105,000 (yielding a pixel size of 0.64 Å), with a total dose of 50.6 e/Å<sup>2</sup>.  
285 Thermo Fisher Scientific EPU software was used to collect a total of 21,341 images, which were  
286 dose fractionated into 40 movie frames, with defocus values ranging from 0.8 to 1.8  $\mu$ m, at 0.1  $\mu$ m  
287 increments. The collected frames were motion-corrected and dose-weighted using MotionCor2<sup>58</sup>.  
288 The contrast transfer function parameters were estimated using Ctfind-4.1<sup>59</sup>. A total of 734,768  
289 particles were picked using reference-free picking in RELION-v.3<sup>60</sup>. The picked particles were  
290 processed for reference-free 2D averaging, resulting in 508,108 particles for the initial model  
291 building; both steps were performed when using RELION. Following the initial model creation,  
292 the 2D subset was used for the 3D classification, resulting in three distinct classes in RELION.  
293 From these, the best class was selected, which contained a total of 379,578 particles. These  
294 particles were pooled together and processed for 3D homogeneous refinement and postprocessing  
295 using RELION. The reported 2.34 Å resolution of PSII was based on a gold-standard refinement,  
296 applying the 0.143 criteria on the FSC between the reconstructed half-maps. (Extended Data Fig.  
297 2 and Extended Data Table 2)

298

299 **Data availability:** The atomic coordinates of the three supercomplexes have been deposited in the  
300 Protein Data Bank, with accession code PDB 8BD3. The cryoEM maps have been deposited in  
301 the Electron Microscopy Data Bank, with accession codes PDB entry ID 8BD3 and EMDB entry  
302 ID EMD 15973

303 **Acknowledgements:** The authors thank the Electron Microscopy Core Facility (EMCF) at the  
304 European Molecular Biology Laboratory (EMBL) for their support. Dr Felix Weis is gratefully  
305 acknowledged and thanked for his excellent assistance and guidance in the data collection. The  
306 molecular graphics and analyses were performed with UCSF Chimera, which was developed by  
307 the Resource for Biocomputing, Visualization, and Informatics at the University of California, San  
308 Francisco, with support from NIH P41-GM103311. This work was supported by The Israel  
309 Science Foundation (Grant No. 199/21).

310  
311 **Author contributions:** N.N. designed and performed the experiments, organised the data  
312 collection, and built the structural model. M.F. designed and implemented the *C. ohadii* growth,  
313 the protein purifications, and purified the PSII complexes. D.K. processed the cryoEM data,  
314 calculated the results, and built the model. I.C. helped with the cryoEM calculation, and writing  
315 the manuscript.

316  
317 **Competing interests:** The authors declare that there are no competing interests.  
318

319 **Abbreviations:** Plastoquinone: dimethyl-1,4-benzoquinone molecule, with a side chain of nine  
320 isoprenyl units (PQ); PQ, plastoquinone; Q<sub>A</sub> and Q<sub>B</sub>, primary and secondary quinone electron  
321 acceptors; OEX, water oxidizing complex.

322

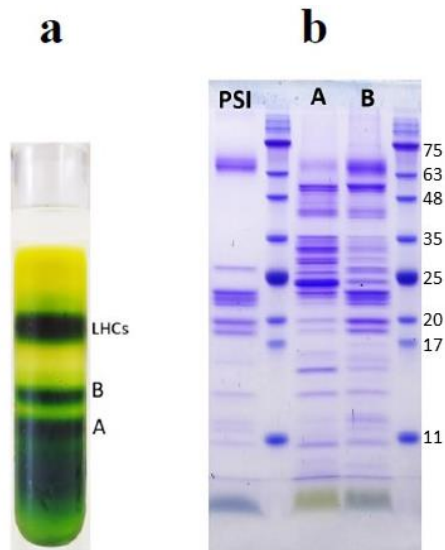

323

324 **Supplementary Figure 1: Sucrose gradient and SDS-PAGE of *Chlorella ohadii* PSII**  
325 **preparation:**

326 **a.** Sucrose density gradient of the final *Chlorella ohadii* PSII preparation. The three fractions  
327 collected are marked A, B, and LHCs. The A fraction was used for cryo-EM data collection. **b.**  
328 SDS-PAGE of the fractions A and B and previous PSI preparation for comparison with new  
329 preparation.

330

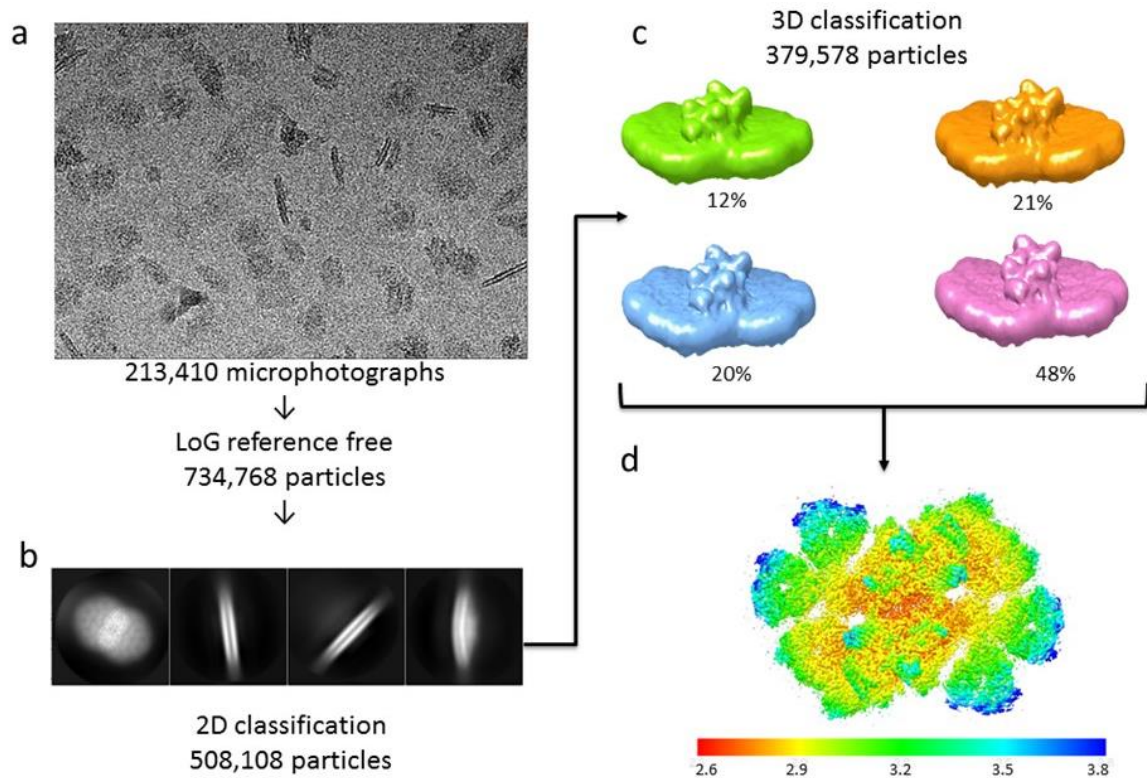

331

332 **Supplementary Figure 2: Cryo-EM data collection and processing scheme for unstacked**  
333 **PSII complex.**

334 **a.** Sample micrograph collected for the *Chlorella ohadii* PSII dataset displaying stacked and  
335 unstacked PSII particles from multiple views. **b.** 2D classes showing unstacked PSII complexes  
336 were created in RELION followed by 3D classification. **c.** Chosen unstacked PSII 3D classes  
337 subjected to refinement with numbers and percentage of all chosen particles. **d.** Final model of  
338 *Chlorella ohadii* PSII with a color-coded global resolution of 2.72 Å.  
339

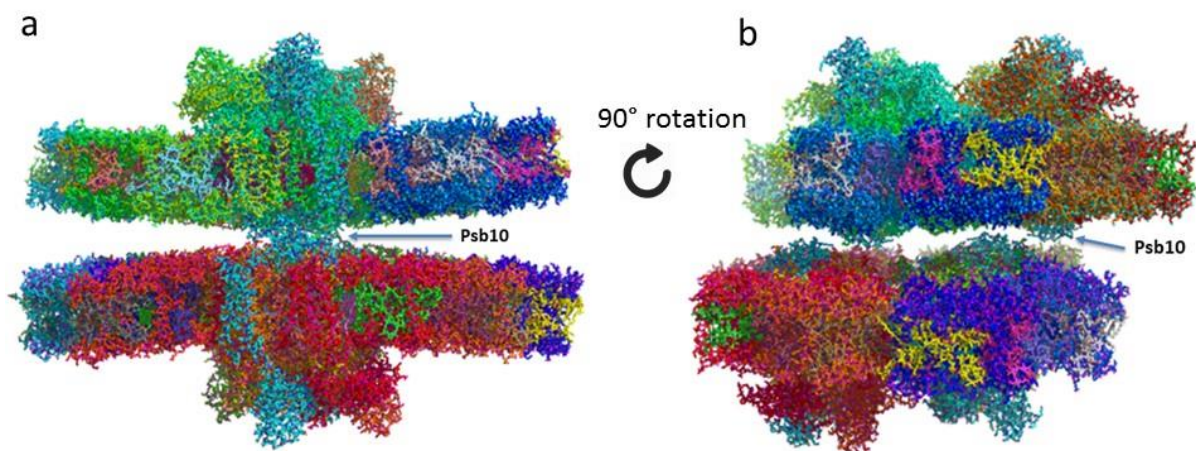

340

341 **Supplementary Fig.3: Stacked PSII from *Chlorella ohadii* showing that Psb10 is involved**  
342 **in the stacking formation.**

343 a. Side view along the membrane plane of stacked PSII. Psb10 may provide contacts for  
344 PSII dimer stacking. b. 90° rotation in the membrane plane of the complex presented on  
345 S.Fig.3a.

346

347 In the presented algae and another inferior plants present in PDB, we see 3-5 copies, whereas  
348 high plant contain mostly 1, sometime 2 copies.

```
Chlorella ohadii (QFB70705.1): 4 genome repeats, 2 variants
Sbjct 160 DNRFGTIALLAVPVIGWVLFN ILGPLQNQLNAMS 193
Sbjct 322 DNRFGTIALLAVPVIGWVLFN ILGPLQNQLNAMS 355
Sbjct 76 DNRFGTIALLAVPVLGWVGFN ILNPLQNQLDAMS 109
Sbjct 238 DNRFGTIALLAVPVLGWVGFN ILNPLQNQLDAMS 271

Microactinium conductrix (PSC75791.1): 5 genome repeats, 4 variants
Sbjct 144 DNRFGTIALLALPVVGWVLFN ILGPLKNQIDAM 176
Sbjct 75 DNRFGTLALLAVPVVGWVGFN ILGPLQNQIDAM 107
Sbjct 351 DNRFGTLALLALPALGWVGFN ILGPLQNQLKSM 383
Sbjct 213 DNRFGTLALLALPALGWVGFN ILGPLKNQIDAM 245
Sbjct 282 DNRFGTLALLALPALGWVGFN ILGPLKNQIDAM 314

Chlamydomonas reinhardtii (XP_001698338.2): 5 genome repeats, 2 variants
Sbjct 81 DNRAGILATLLVPVLGWVGFN IFGSLQAQLNQM 113
Sbjct 152 DNRVAILATLLVPVIGWVGFN IFGSLQAQLNQM 184
Sbjct 223 DNRVAILATLLVPVIGWVGFN IFGSLQAQLNQM 255
Sbjct 294 DNRVAILATLLVPVIGWVGFN IFGSLQAQLNQM 326
Sbjct 365 DNRVAILATLLVPVIGWVGFN IFGSLQAQLRQM 397

Scenedesmus sp. PABB004 (KAF8060329.1) 5 genome repeats, 3 variants
Sbjct 295 DNRFGTITLLFAPVVGWVAFNMLTPASNQLNRMN 328
Sbjct 454 DNRFGTITLLFAPVVGWVAFNMLTPASNQLNRMN 487
Sbjct 374 DNRLGTIALLFAPVVGWVGFNMLTPLFNQLNRMN 407
Sbjct 533 DNRLGTIALLFAPVVGWVGFNMLTPLFNQLNRMN 566
Sbjct 215 DNRLGTISLLFLPALGWVAFN ILQPLLNVGRMS 248

Glycine max (NP_001240940.1): 2 genome repeats, 2 variants
Sbjct 83 DNRGLALLLP IIPAIGWVLFN ILQPALNQLNRM 115
Sbjct 152 DNRGQLLLFVVT PAIAWVLYN ILQPALNQLNRM 184

Chenopodium quinoa (XP_021746540.1): 1 genome repeat, 1 variant
Sbjct 151 DNRGTLLLLVLP AIAGWVLFN ILQPALNQLNKM 183
```

349

350 **Supplementary Fig.4. Number of different copies of the PsbY, presented in the single**  
351 **transcripts of 4 algae and 2 high plants.**

352 In the presented algae and another inferior plants present in PDB, we see 3-5 copies, whereas  
353 high plant contain mostly 1, sometime 2 copies.

354

## 355 References

356 1. Croce R. Light harvesting in oxygenic photosynthesis. Biochim Biophys Acta Bioenerg. 2020  
357 Apr 1;1861(4):148172. doi: 10.1016/j.bbabi.2020.148172.



- 358  
359 2. Yocum CF. (2022) Photosystem 2 and the oxygen evolving complex: a brief overview.  
360 Photosynthesis Research <https://doi.org/10.1007/s11120-022-00910-1>  
361
- 362 3. Nelson, N. & Ben-Shem, A. The complex architecture of oxygenic photosynthesis. *Nat. Rev.*  
363 *Mol. Cell Biol.* 5, 971–982 (2004).  
364
- 365 4. Sheng, X., Watanabe, A., Li, A., Kim, E., Song, C., Murata, K., Song, D., Minagawa, J., Liu, Z.  
366 Structural insight into light harvesting for photosystem II in green algae. *Nat Plants* 5: 1320-1330  
367 (2019).  
368
- 369 5. Drop, B. et al. Light-harvesting complex II (LHCII) and its supramolecular organization in  
370 *Chlamydomonas reinhardtii*. *Biochim. Biophys. Acta* 1837, 63–72 (2014).  
371
- 372 6. Aro, E.-M., Virgin, I. & Andersson, B. Photoinhibition of Photosystem II. Inactivation, protein  
373 damage and turnover. *Biochimica et Biophysica Acta (BBA) - Bioenergetics* **1143**, 113-134,  
374 doi:[https://doi.org/10.1016/0005-2728\(93\)90134-2](https://doi.org/10.1016/0005-2728(93)90134-2) (1993)  
375
- 376 7. Fischer, B. B., Hideg, É. & Krieger-Liszka, A. Production, Detection, and Signaling of Singlet  
377 Oxygen in Photosynthetic Organisms. *Antioxidants & Redox Signaling* **18**, 2145-2162,  
378 doi:10.1089/ars.2012.5124 (2013).  
379
- 380 8. Treves, H. et al. A newly isolated *Chlorella* sp. from desert sand crusts exhibits a unique  
381 resistance to excess light intensity. *FEMS Microbiology Ecology* 86, 373-380, doi:10.1111/1574-  
382 6941.12162 (2013)  
383
- 384 9. Treves, H. *et al.* The mechanisms whereby the green alga *Chlorella ohadii*, isolated from desert  
385 soil crust, exhibits unparalleled photodamage resistance. *New Phytologist* **210**, 1229-1243,  
386 doi:10.1111/nph.13870 (2016).  
387
- 388 10. Kedem, I., Milrad, Y., Kaplan, A. & Yacoby, I. Juggling Lightning: How *Chlorella ohadii*  
389 handles extreme energy inputs without damage. *Photosynthesis Research*, doi:10.1007/s11120-  
390 020-00809-9 (2021).  
391
- 392 11. Ananyev, G., Gates, C., Kaplan, A. & Dismukes, G. C. Photosystem II-cyclic electron flow  
393 powers exceptional photoprotection and record growth in the microalga *Chlorella ohadii*.  
394 *Biochimica et Biophysica Acta (BBA) - Bioenergetics* **1858**, 873-883,  
395 doi:<https://doi.org/10.1016/j.bbabi.2017.07.001> (2017).  
396
- 397 12. Shen, L., Huang, Z., Chang, S., Wang, W., Wang, J., Kuang, T., Han, G., Shen, J.R., Zhang,  
398 X. Structure of a C2S2M2N2-type PSII-LHCII supercomplex from the green alga *Chlamydomonas*  
399 *reinhardtii*. *Proc Natl Acad Sci U S A* 116: 21246-21255 (2019).  
400
- 401 13. Bricker TM, Frankel LK.J Auxiliary functions of the PsbO, PsbP and PsbQ proteins of higher  
402 plant Photosystem II: a critical analysis. *Photochem Photobiol B.* 2011 Jul-Aug;104(1-2):165-78.  
403 doi: 10.1016/j.jphotobiol.2011.01.025.  
404
- 405 14. Ettinger WF, Theg SM (1991) Physiologically active chloroplasts contain pools of  
406 unassembled extrinsic proteins of the photosynthetic oxygen evolving enzyme complex in the  
407 thylakoid lumen. *J Cell Biol* 115:321–328. <https://doi.org/10.1083/jcb.115.2.321>

- 408  
409 15. Ifuku K, Yamamoto Y, Ono T-A, Usgugara SM, Sati F (2005) PsbP protein, but not PsbQ  
410 protein, is essential for the regulation and stabilization of photosystem II in higher plants. *Plant*  
411 *Physiol* 139:1175–1184. <https://doi.org/10.1104/pp.105.068643>  
412  
413 16. Bayro-Kaiser V. and Nelson N. Temperature Sensitive Photosynthesis: point mutated CEF-G,  
414 PRK or PsbO act as temperature-controlled switches for essential photosynthetic processes.  
415 *Frontiers in Plant Science*. 11:562985. doi: 10.3389/fpls.2020.562985 (2020).  
416  
417 17. Mayfield SP, Rahire M, Frank G, Zuber H, Rochaix JD. Expression of the nuclear gene  
418 encoding oxygen-evolving enhancer protein 2 is required for high levels of photosynthetic oxygen  
419 evolution in *Chlamydomonas reinhardtii*. *Proc Natl Acad Sci U S A*. 1987 Feb;84(3):749-53. doi:  
420 10.1073/pnas.84.3.749.  
421  
422 18. Rochaix, J.-D. & Bassi, R. LHC-like proteins involved in stress responses and  
423 biogenesis/repair of the photosynthetic apparatus. *Biochemical Journal* **476**, 581-593,  
424 doi:10.1042/bcj20180718 (2019).  
425  
426 19. Liu, J., Lu, Y., Hua, W. & Last, R. L. A New Light on Photosystem II Maintenance in Oxygenic  
427 Photosynthesis. *Frontiers in Plant Science* **10**, doi:10.3389/fpls.2019.00975 (2019).  
428  
429 20. Caspy I, Fadeeva M, Mazor Y and Nathan Nelson N (2021) Structure of Dunaliella  
430 Photosystem II reveals conformational flexibility of stacked and unstacked supercomplexes.  
431 bioRxiv, DOI: 10.1101/2021.11.29.470333  
432  
433 21. Banerjee S, Seal S, Dey R, Mondal KK, Bhattacharjee P. Mutational spectra of SARS-CoV-2  
434 orf1ab polyprotein and signature mutations in the United States of America. *J Med Virol*. 2021  
435 Mar;93(3):1428-1435. doi: 10.1002/jmv.26417. Epub 2020 Aug 25.  
436  
437 22. Nelson, N. and Yocum, C. (2006). Structure and Function of Photosystems I and II. **Annu.**  
438 **Rev. Plant Biol.** 57, 521-565.  
439  
440 23. de Wijn R, van Gorkom HJ. *Biochemistry*. Kinetics of electron transfer from Q(a) to Q(b) in  
441 photosystem II. 2001 Oct 2;40(39):11912-22. doi: 10.1021/bi010852r.  
442  
443 24. Renger G, Light induced oxidative water splitting in photosynthesis: energetics, kinetics and  
444 mechanism, *J. Photochem. Photobiol. B Biol.* 104 (2011) 35–43.  
445  
446 25. Rappaport F, Guergova-Kuras M, Nixon PJ, Diner BA, Lavergne J. Kinetics and pathways of  
447 charge recombination in photosystem II, *Biochemistry* 41 (2002) 8518–8527.  
448  
449 26. Eisenstadt D, Barkan E, Luz B, Kaplan A. Enrichment of oxygen heavy isotopes during  
450 photosynthesis in phytoplankton, *Photosynth. Res.* 103 (2010) 97–103.  
451  
452 27. Müh F, Renger T, Zouni A. Crystal structure of cyanobacterial photosystem II at 3.0 Å  
453 resolution: a closer look at the antenna system and the small membrane- intrinsic subunits, *Plant*  
454 *Physiol. Biochem.* 46 (2008) 238–264.  
455  
456 28. Pospisil, Production of reactive oxygen species by photosystem II as a response to light and  
457 temperature stress. *Front. Plant Sci.* 7, 1950 (2016).

- 458  
459 29. Fantuzzi A, Allgöwer F, Baker H, McGuire G, Teh WK, Gamiz-Hernandez AP, Kaila  
460 VRI, Rutherford AW. Bicarbonate-controlled reduction of oxygen by the Q A semiquinone in  
461 Photosystem II in membranes. *Proc Natl Acad Sci U S A*. 2022 Feb 8;119(6):e2116063119.  
462 doi: 10.1073/pnas.2116063119.  
463  
464 30. Liu, J., Lu, Y., Hua, W. & Last, R. L. A New Light on Photosystem II Maintenance in  
465 Oxygenic Photosynthesis. *Frontiers in Plant Science* 10, doi:10.3389/fpls.2019.00975 (2019).  
466  
467 31. Li, L., Aro, E.-M. & Millar, A. H. Mechanisms of Photodamage and Protein Turnover in  
468 Photoinhibition. *Trends in Plant Science* 23, 667-676,  
469 doi:<https://doi.org/10.1016/j.tplants.2018.05.004> (2018).  
470  
471 32. Keren, N. & Krieger - Liskay, A. Photoinhibition: molecular mechanisms and  
472 physiological significance. *Physiologia Plantarum* 142, 1-5 (2011).  
473  
474 33. Virtanen O, Khorobrykh S, Tyystjärvi E. Acclimation of *Chlamydomonas reinhardtii* .33  
475 to extremely strong light. *Photosynth Res*. 2021 Jan;147(1):91-106. doi: 10.1007/s11120-020-  
476 00802-2. Epub 2020 Dec  
477  
478 34. Røkke G, Melø TB, Hohmann-Marriott MF. The plastoquinone pool of *Nannochloropsis*  
479 *oceanica* is not completely reduced during bright light pulses. *PLoS One*. 2017 Apr  
480 .12;12(4):e0175184. doi: 10.1371/journal.pone.0175184. eCollection 2017  
481  
482 35. Suslichenko IS, Tikhonov AN. Photo-reducible plastoquinone pools in chloroplasts of  
483 *Tradescantia* plants acclimated to high and low light. *FEBS Lett*. 2019 Apr;593(8):788-798. doi:  
484 10.1002/1873-3468.13366. Epub 2019 Mar 30. PMID: 30896038  
485  
486 36. Guskov, A.; Kern, J.; Gabdulkhakov, A.; Broser, M.; Zouni, A.; Saenger, W. Cyanobacterial  
487 photosystem II at 2.9 Å resolution: role of quinones, lipids, channels and chloride. *Nat. Struct.*  
488 *Mol. Biol.*, 2009, 16, 334-342.  
489  
490 37. Loll, B., Kern, J., Saenger, W., Zouni, A. & Biesiadka, J. Towards complete cofactor  
491 arrangement in the 3.0 Å resolution structure of photosystem II. *Nature* 438, 1040–1044 (2005).  
492  
493 38. Lambrevia MD, Russo D, Polticelli F, Scognamiglio V, Antonacci A, Zobnina V, Campi G,  
494 Rea G. Structure/Function/Dynamics of Photosystem II Plastoquinone Binding Sites. *Curr Protein*  
495 *Pept Sci*. 2014;15(4):285-95. doi: 10.2174/1389203715666140327104802.  
496  
497 39. Moser CC, et al. Nature of biological electron transfer. *Nature* 355(6363):796-802. doi:  
498 10.1038/355796a0. 1992. PMID: 1311417  
499  
500 40. Van Eerden FJ, Melo MN, Frederix PWJM, Periole X, Marrink SJ. *Nat Commun*. Exchange  
501 pathways of plastoquinone and plastoquinol in the photosystem II complex  
502 2017 May 10;8:15214. doi: 10.1038/ncomms15214.  
503  
504 41. Battaglino B, Grinzato A, Pagliano C. *Plants (Basel)*. Binding Properties of Photosynthetic  
505 Herbicides with the Q B Site of the D1 Protein in Plant Photosystem II: A Combined Functional  
506 and Molecular Docking Study. 2021 Jul 21;10(8):1501. doi: 10.3390/plants10081501  
507

- 508 42. Erickson JM, Rahire M, Bennoun P, Delepelaire P, Diner B, Rochaix J. Herbicide resistance  
509 in *Chlamydomonas reinhardtii* results from a mutation in the chloroplast gene for the 32-kilodalton  
510 protein of photosystem II. *Proc Natl Acad Sci U S A*. 1984 Jun;81(12):3617-21. doi:  
511 10.1073/pnas.81.12.3617
- 512
- 513 43. Broser et al., Structural basis of cyanobacterial photosystem II Inhibition by the herbicide  
514 terbutryn. *J Biol Chem*. 2011 May 6;286(18):15964-72. doi: 10.1074/jbc.M110.215970.  
515
- 516 44. Vass, I. Molecular mechanisms of photodamage in the Photosystem II complex. *Biochimica*  
517 *et Biophysica Acta (BBA) - Bioenergetics* 1817, 209-217Zheng, S. Q. et al. MotionCor2:  
518 anisotropic correction of beam-induced motion for improved cryo-electron microscopy. *Nat.*  
519 *Methods* 14, 331–332 (2017).  
520
- 521 45. Rohou, A. & Grigorieff, N. CTFFIND4: fast and accurate defocus estimation from  
522 electron micrographs. *J. Struct. Biol.* 192, 216–221 (2015).  
523
- 524 46. Zivanov, J. et al. New tools for automated high-resolution cryo-EM structure  
525 determination in RELION-3. *Elife* 7, e42166 (2018).  
526
- 527 47. Eldar, A., Landa, B. & Shkolnisky, Y. KLT picker: particle picking using data-driven  
528 optimal templates. *J. Struct. Biol.* 210, 107473 (2020).  
529
- 530 48. Greenberg, I. & Shkolnisky, Y. Common lines modeling for reference free ab-initio  
531 reconstruction in cryo-EM. *J. Struct. Biol.* 200, 106–117 (2017).  
532
- 533 49. Tang, G. et al. EMAN2: an extensible image processing suite for electron microscopy. *J.*  
534 *Struct. Biol.* 157, 38–46 (2007).  
535
- 536 50. Badura, A. et al. Photo-induced electron transfer between photosystem 2 via cross-linked  
537 redox hydrogels. *Electroanalysis* 20, 1043–1047 (2008).
